# Supplementary material
Source: Springer Nature journal article supplement (https://www.springermedizin.de/resource/supplementary/12936_2007_435_MOESM3_ESM.pdf/9547444)
Supplement: MOESM3 [file 9547444]

**(a)**

i) Offspring food

ii) Parent food

iii) Parent\*offspring

iv) Parent \* Offspring:  
controlling for adult size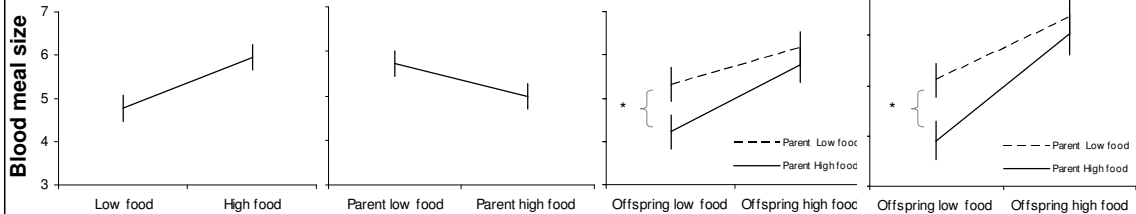**(b)**

i) Offspring food

ii) Parent food

iii) Parent \* Offspring

iv) Parent \* Offspring  
controlling for adult sizev) Parent \* Offspring  
controlling for blood meal size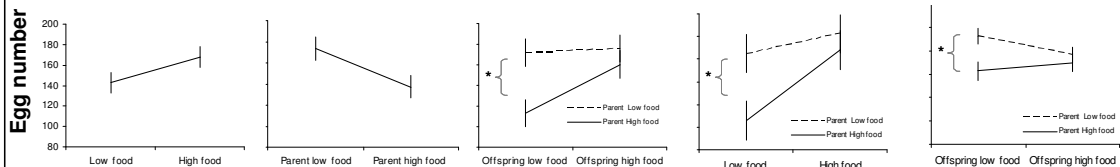

\* } Significant difference
